# Supplementary material
Source: PubMed Central journal article supplement (PMC4153461)
Supplement: supp_the2014-0072_Bellmunt-14-72.pdf [file supp_the2014-0072_Bellmunt-14-72.pdf]

## Overview

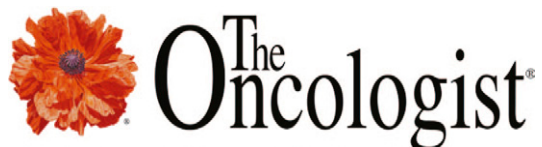

The official journal of the Society for Translational Oncology

**First Published Online August 20, 2014**

**DOI:** 10.1634/theoncologist.2014-0072

**Title:** Phase I Study of Sunitinib in Combination With Gemcitabine and Capecitabine for First-Line Treatment of Metastatic or Unresectable Renal Cell Carcinoma

**Authors:** Joaquim Bellmunt,<sup>a,d</sup> Cristina Suarez,<sup>b</sup> Enrique Gallardo,<sup>c</sup> Jordi Rodon,<sup>b</sup> Francesc Pons,<sup>d</sup> Teresa Bonfill,<sup>c</sup> Marta Beltran,<sup>b</sup> Irene Moya,<sup>c</sup> Susana Galtes,<sup>d</sup> Joan Albanell,<sup>d</sup> Joan Carles<sup>b</sup>

<sup>a</sup>Hospital del Mar, Barcelona, Spain; <sup>b</sup>Vall d'Hebron University Hospital, Universitat Autònoma of Barcelona, Barcelona, Spain; <sup>c</sup>Parc Taulí Sabadell Hospital Universitari, Barcelona, Spain; <sup>d</sup>Hospital del Mar Medical Research Institute and Pompeu Fabra University, Barcelona, Spain

**European Clinical Trial Registry Identifier:** EudraCT: 2007-001021-10

**Sponsor(s):** SOGUG (Spanish Oncology Genito Urinary Group) 07-02

**Principal Investigator:** Joaquim Bellmunt

**IRB Approved:** Yes

### Disclosures

**Enrique Gallardo:** Pfizer (C/A). The other authors indicated no financial disclosures.

(C/A) Consulting/advisory relationship; (RF) Research funding; (E) Employment; (ET) Expert testimony; (H) Honoraria received; (OI) Ownership interests; (IP) Intellectual property rights/inventor/patent holder; (SAB) Scientific advisory board

## Author Summary: Abstract and Brief Discussion

### Background

The combination of gemcitabine plus capecitabine and sunitinib (GCS) shows activity in metastatic renal cell carcinoma (mRCC). We tested the multitargeted “chemo-switch” regimen as first-line treatment in patients with mRCC.

### Methods

We assessed the maximum tolerated dose and antitumor activity of GCS in treatment-naïve, advanced mRCC patients. Treatment consisted of intravenous gemcitabine on days 1 and 8, oral capecitabine twice daily on days 1–14, and oral sunitinib daily for six 21-day cycles, followed by sunitinib monotherapy at the investigator's discretion. Dose level 0 (DL0) was gemcitabine 1,000 mg/m<sup>2</sup> per day plus capecitabine 650 mg/m<sup>2</sup> per 12 hours plus sunitinib 37.5 mg/day; DL1 was gemcitabine 1,000 mg/m<sup>2</sup> per day plus capecitabine 850 mg/m<sup>2</sup> per 12 hours plus sunitinib 37.5 mg/day.

### Results

Sixteen patients were enrolled. At DL1, two of four patients had dose-limiting toxicity (DLT; grade 3 diarrhea and grade 4 thrombocytopenia). The dose was reduced to DL0 when only 1 of 12 patients experienced DLT (grade 3 diarrhea, grade 3 mucositis, and grade 3 thrombocytopenia). Dose reductions were frequent (58% of patients), and only seven patients were able to receive the three drugs for more than three cycles. One patient achieved a complete response, three had partial responses, and the best response for four was stable disease.

### Conclusion

The safety profile of the combination does not seem manageable in this patient population. No further development of the combination is recommended.

## Discussion

Treatment with agents targeting vascular endothelial growth factor (VEGF) receptors and mammalian target of rapamycin have reached a plateau in terms of median progression-free and overall survival, and several strategies have attempted to improve the outcome.

Pietras et al. developed the “chemo-switch” concept, applying the combination of targeted agents with chemotherapy using the standard maximum tolerated doses (MTDs) in combination with low doses of chemotherapeutic drugs given continuously on a daily basis (metronomic chemotherapy). A synergistic effect has been demonstrated in xenograft mouse models, and we saw promising data in a prior clinical trial.

The tyrosine kinase inhibitor sunitinib inhibits several receptor tyrosine kinases, including VEGF and platelet-derived growth factor 2 (PDGF2), and has shown efficacy in patients with metastatic renal cell carcinoma (mRCC), as first- and as second-line treatment [3, 4]. It is believed that the anti-VEGF and the anti-PDFG effects act in a synergistic way with metronomic chemotherapy. Consequently, the triple combination of gemcitabine plus capecitabine and sunitinib was tested in our phase I study as first-line therapy in advanced RCC or mRCC patients to determine the MTD, to assess safety, and to observe preliminary efficacy results [5].

Three patients showed dose-limiting toxicity (DLT), two at dose level 1 (DL1; grade 4 thrombocytopenia in one patient and grade 3 diarrhea and thrombocytopenia in the other) and one at DLO (grade 3 mucositis and thrombocytopenia). One grade 5 cardiovascular toxicity unrelated to trial medication was seen. Eight patients suffered serious adverse events (SAEs). The study treatment-related causes for hospitalization in the other SAE-presenting patients were thrombocytopenia, neutropenia, mucositis, hypertensive crisis, asthenia, and anorexia. In addition, other AEs not related to the study medication caused hospitalization or prolonged hospitalization. Disease progression was reported as the cause of hospitalization in three patients, and it was not considered related to the study medication in any case.

The regimen was poorly tolerated by patients, and more than half experienced asthenia, neutropenia, thrombocytopenia, mucositis, diarrhea, or nausea. The combination of gemcitabine plus capecitabine alone in RCC patients showed a high incidence of grade 3–4 neutropenia and persistent grade 1–2 fatigue and gastrointestinal toxicities in addition to hand-foot syndrome events that would generally be unacceptable by a large percentage of patients [6]. Although hand-foot syndrome is also a common adverse event of sunitinib [7, 8], the incidence of this event in our study was low (four events in three patients) compared with that observed in the study using gemcitabine plus capecitabine alone [6], probably due to the lower dose of capecitabine in the current study.

Although data on efficacy are limited, the triple combination does not seem to be better than sunitinib alone as first-line treatment [4, 8] and as second-line treatment [3, 9].

The use of sunitinib in combination with gemcitabine at MTDs followed by capecitabine administered in a metronomic way, exploring the chemo-switch concept, did not prove feasible because of toxicity and premature treatment discontinuation. This triple combination cannot be recommended for further study.

## Trial Information

|                                                        |                                       |
|--------------------------------------------------------|---------------------------------------|
| <b>Disease</b>                                         | Renal cell carcinoma – clear cell     |
| <b>Disease</b>                                         | Renal cell carcinoma – not clear cell |
| <b>Stage of disease / treatment</b>                    | Metastatic / Advanced                 |
| <b>Prior Therapy</b>                                   | No designated number of regimens      |
| <b>Type of study - 1</b>                               | Phase I                               |
| <b>Type of study - 2</b>                               | Other                                 |
| <b>Primary Endpoint</b>                                | Maximum Tolerated Dose                |
| <b>Secondary Endpoint</b>                              | Tolerability                          |
| <b>Additional Details of Endpoints or Study Design</b> |                                       |
| <b>Investigator’s Analysis</b>                         | Poorly Tolerated/Not Feasible         |

## Drug Information

### Drug 1

Generic/Working name Sunitinib

Trade name SUTENT

Company name Pfizer

Drug class Angiogenesis - VEGF

Dose 50 mg/day

Schedule of Administration Daily for six 21-day cycles, followed by sunitinib monotherapy

### Drug 2

Generic/Working name Gemcitabine

Drug class Other

Dose 1,000 mg/m<sup>2</sup> per day

Schedule of Administration On days 1 and 8

### Drug 3

Generic/Working name Capecitabine

Drug class Other

Dose 1,000 mg/m<sup>2</sup> b.i.d.

Schedule of Administration Twice daily on days 1–14

| Dose Level | Dose of Drug:<br>Sunitinib | Dose of Drug:<br>Gemcitabine    | Dose of Drug:<br>Capecitabine | Number<br>Enrolled | Number Evaluable<br>for Toxicity |
|------------|----------------------------|---------------------------------|-------------------------------|--------------------|----------------------------------|
| DL0        | 37.5 mg/day                | 1,000 mg/m <sup>2</sup> per day | 650 mg/m <sup>2</sup> b.i.d.  | 12                 | 12                               |
| DL1        | 37.5 mg/day                | 1,000 mg/m <sup>2</sup> per day | 850 mg/m <sup>2</sup> b.i.d.  | 4                  | 4                                |

## Patient Characteristics

Number of patients, male 13

Number of patients, female 3

Stage

II

III

IV

Metastatic

Age Median (range): 66.5 (43–78)

Number of prior systemic therapies Median (range): Not Collected

Performance Status: ECOG

0–7

1–8

2–

3–

Unknown—

Cancer Types or Histologic Subtypes

Clear cell 11

Papillary carcinoma 4

Other: Clear cell plus sarcomatoid component 1

## Primary Assessment Method

### Experimental Arm: Total Patient Population

|                                           |       |
|-------------------------------------------|-------|
| Number of patients enrolled               | 16    |
| Number of patients evaluable for toxicity | 16    |
| Evaluation method                         | Other |

## Dose limiting toxicity

| Dose Level | Dose of Drug: Sunitinib | Dose of Drug: Gemcitabine       | Dose of Drug: Capecitabine   | Number Enrolled | Number Evaluable for Toxicity | Number With a Dose Limiting Toxicity | Dose Limiting Toxicity Information                                                                   |
|------------|-------------------------|---------------------------------|------------------------------|-----------------|-------------------------------|--------------------------------------|------------------------------------------------------------------------------------------------------|
| DL0        | 37.5 mg/day             | 1,000 mg/m <sup>2</sup> per day | 650 mg/m <sup>2</sup> b.i.d. | 12              | 12                            | 1                                    | Neutropenia, thrombocytopenia, hypovolemic shock, neutropenia, thrombocytopenia, diarrhea, mucositis |
| DL1        | 37.5 mg/day             | 1,000 mg/m <sup>2</sup> per day | 850 mg/m <sup>2</sup> b.i.d. | 4               | 4                             | 2                                    | 2× thrombocytopenia, hyperglucemia, diarrhea, low GI hemorrhage, mucositis                           |

## Assessment, Analysis, and Discussion

|                                     |                               |
|-------------------------------------|-------------------------------|
| Completion                          | Study completed               |
| Pharmacokinetics / Pharmacodynamics | Not Collected                 |
| Investigator's Assessment           | Poorly Tolerated/Not Feasible |

### Discussion

Treatment with agents targeting vascular endothelial growth factor (VEGF) receptors and mammalian target of rapamycin have reached a plateau in terms of median progression-free survival (PFS) and overall survival (OS), and several strategies have attempted to improve the outcomes of patients receiving these therapies. Pietras et al. introduced the “chemo-switch” concept, which combines targeted agents with chemotherapy using standard maximum tolerated doses (MTDs) in combination with low doses of chemotherapeutic drugs given continuously on a daily basis (metronomic chemotherapy). Using this approach, a synergistic effect has been demonstrated in a mouse model.

The tyrosine kinase inhibitor sunitinib inhibits several receptor tyrosine kinases, including VEGF and platelet-derived growth factor 2 (PDGF2), and has shown efficacy in patients with metastatic renal cell carcinoma (mRCC), as first- and second-line treatment [3, 4]. It is believed that the anti-VEGF and anti-PDFG effects act in a synergistic way with metronomic chemotherapy. Consequently, the triple combination of gemcitabine plus capecitabine and sunitinib was tested in our phase I study in advanced RCC and mRCC patients to determine the MTD, to assess safety, and to observe preliminary efficacy results [5].

An open-label phase I dose-escalation study was conducted to determine the MTD and the safety profile of sunitinib in combination with gemcitabine and capecitabine (GC) in sunitinib-naïve patients with advanced RCC or mRCC and assessed treatment efficacy in terms of objective response (complete response [CR] or partial response [PR]) and disease control rate (CR, PR, or stable disease [SD]) and to find out the OS and PFS of treated patients (Table 1).

A 3 + 3 dose escalation rule was followed with three patients initially enrolled at dose level 0 (DL0). The MTD is the DL at which two of three or two of six patients exhibit DLT during the first treatment cycle. The DL at which one or more of six patients exhibits DLT is the recommended dose for phase II studies.

Three patients were enrolled at DL0 and showed no DLT at the first cycle. Thus, two patients were enrolled at DL1. Neither patient showed DLT; however, the following two did present DLT (grade 4 thrombocytopenia in one patient and grade 3 diarrhea, mucositis, and thrombocytopenia in the other). The toxicity profile observed in the four patients included in DL1, with significant hematologic toxicities from the second cycle on, resulted in the decision not to include any more patients at DL1. Three more patients were enrolled at DL0, and none exhibited DLT; then, six additional patients were enrolled for confirmation of DL0 as the MTD. Only 1 of the 12 patients experienced DLT (grade 3 mucositis and thrombocytopenia); therefore, the MTD was sunitinib 37.5 mg, capecitabine 650 mg/m<sup>2</sup>, and gemcitabine 1,000 mg/m<sup>2</sup>.

All 16 patients were evaluated for safety, and all showed at least one adverse event related to the study drugs, most grade 1 or 2. As per investigator assessment, 49% of drug-related events were related to the combination of the three drugs; 29% were related to chemotherapy (either gemcitabine or capecitabine or GC), 3.6% to sunitinib and capecitabine, and 18% to sunitinib alone. Eight patients suffered serious adverse events (SAEs) (Tables 2–4).

Three patients showed DLT, two at DL1 (grade 4 thrombocytopenia in one patient and grade 3 diarrhea, mucositis, and thrombocytopenia in the other) and one at DL0 (grade 3 mucositis and thrombocytopenia). Eight patients suffered SAEs. Hypovolemic shock, which caused the death of one patient, was not considered related to any study drug but most likely to a cardiovascular event, based on prior patient medical history. The study treatment-related causes for hospitalization in the other SAE-presenting patients were thrombocytopenia, neutropenia, mucositis, hypertensive crisis, asthenia, and anorexia.

The regimen was poorly tolerated, and more than half of the patients showed asthenia, neutropenia, thrombocytopenia, mucositis, diarrhea, and nausea. The combination of GC alone in RCC patients resulted in a high incidence of grade 3–4 neutropenia, persistent grade 1–2 fatigue, gastrointestinal toxicities, and hand-foot syndrome—events generally unacceptable to a large percentage of patients [6]. Although hand-foot syndrome is also a common adverse event of sunitinib [7, 8], its incidence in our study was low (four events in three patients) compared with that observed in the study using GC alone [6], probably due to the lower dose of capecitabine in the current study.

All patients ( $n = 16$ ) were assessed for progression-free and overall survival. Median PFS was 7.8 months (95% confidence interval [CI]: 2.5 to not reported), and median OS was 8.1 months (95% CI: 6.5–9.7).

Twelve patients were assessable for treatment response according to Response Evaluation Criteria In Solid Tumors. At DL0, four patients (33%) achieved an objective response (one CR and three PRs) and five achieved SD. Both assessable patients at DL1 also achieved SD. Thus, 8 of 12 assessable patients had overall clinical benefit (1 CR, 3 PR, and 7 SD), and the overall disease control rate was 91.7%.

Although data on efficacy were limited, the triple combination does not seem to offer a better alternative than sunitinib alone as first-line treatment [4, 8] or second-line treatment [3, 9]. The use of sunitinib in combination with gemcitabine at MTDs followed by capecitabine administered in a metronomic way, exploring the chemo-switch concept, proved not to be feasible because of toxicity and premature treatment discontinuation. This triple combination cannot be recommended for further study.

## Acknowledgment

J.B. is currently affiliated with Dana-Farber Cancer Institute/Harvard Medical School, Boston, MA.

## References

1. Bellmunt J, Trigo JM, Calvo E et al. Activity of a multitargeted chemo-switch regimen (sorafenib, gemcitabine, and metronomic capecitabine) in metastatic renal-cell carcinoma: A phase 2 study (SOGUG-02-06). *Lancet Oncol* 2010;11:350–357.
2. Roskoski R Jr. Sunitinib: A VEGF and PDGF receptor protein kinase and angiogenesis inhibitor. *Biochem Biophys Res Commun* 2007;356:323–328.
3. Motzer RJ, Michaelson MD, Redman BG et al. Activity of SU11248, a multitargeted inhibitor of vascular endothelial growth factor receptor and platelet-derived growth factor receptor, in patients with metastatic renal cell carcinoma. *J Clin Oncol* 2006;24:16–24.
4. Motzer RJ, Hutson TE, Tomczak P et al. Sunitinib versus interferon alfa in metastatic renal-cell carcinoma. *N Engl J Med* 2007;356:115–124.
5. Pietras K, Hanahan D. A multitargeted, metronomic, and maximum-tolerated dose “chemo-switch” regimen is antiangiogenic, producing objective responses and survival benefit in a mouse model of cancer. *J Clin Oncol* 2005;23:939–952.
6. Stadler WM, Halabi S, Rini B et al. A phase II study of gemcitabine and capecitabine in metastatic renal cancer: A report of Cancer and Leukemia Group B protocol 90008. *Cancer* 2006;107:1273–1279.
7. Kahl C, Hilgendorf I, Freund M et al. Continuous therapy with sunitinib in patients with metastatic renal cell carcinoma. *Onkologie* 2008;31:485.
8. Motzer RJ, Hutson TE, Tomczak P et al. Overall survival and updated results for sunitinib compared with interferon alfa in patients with metastatic renal cell carcinoma. *J Clin Oncol* 2009;27:3584–3590.
9. Escudier B, Roigas J, Gillessen S et al. Phase II study of sunitinib administered in a continuous once-daily dosing regimen in patients with cytokine-refractory metastatic renal cell carcinoma. *J Clin Oncol* 2009;27:4068–4075.

## Figures and Tables

**Table 1.** Patient characteristics

| Characteristics                                   | Results          |
|---------------------------------------------------|------------------|
| Race: White, <i>n</i> (%)                         | 16 (100)         |
| Sex: Male, <i>n</i> (%)                           | 13 (81.3)        |
| Age, years, median (range)                        | 66.5 (43–78)     |
| BMI, kg/m <sup>2</sup> , median (range)           | 25.5 (20.6–33.5) |
| ECOG, <i>n</i> (%) <sup>a</sup>                   |                  |
| 1                                                 | 8 (53.3)         |
| 0                                                 | 7 (46.7)         |
| Time since diagnosis, months, median (range)      | 15 (0.1–81.1)    |
| Primary tumor characteristics, <i>n</i> (%)       |                  |
| Histology                                         |                  |
| Clear cells                                       | 11 (68.8)        |
| Papillary carcinoma                               | 4 (25.0)         |
| Other: clear cells plus sarcomatoid component     | 1 (6.3)          |
| TNM stage, <i>n</i> (%)                           |                  |
| II                                                | 1 (6.7)          |
| III                                               | 1 (6.7)          |
| IV                                                | 13 (86.7)        |
| Motzer risk, <i>n</i> (%)                         |                  |
| Favorable (0)                                     | 7 (43.8)         |
| Intermediate (1–2)                                | 7 (43.8)         |
| Poor ( $\geq 3$ )                                 | 2 (12.5)         |
| Metastasis, <i>n</i> (%)                          |                  |
| Liver                                             | 3 (18.8)         |
| Bone                                              | 3 (18.8)         |
| Lung                                              | 9 (56.3)         |
| Other <sup>b</sup>                                | 11 (68.8)        |
| Number of locations with metastases, <i>n</i> (%) |                  |
| 1                                                 | 7 (43.8)         |
| 2                                                 | 3 (18.8)         |
| $\geq 3$                                          | 6 (37.5)         |

<sup>a</sup>Data not available for one patient.

<sup>b</sup>Retroperitoneal (2), adrenal (2), testicular (1), adenopathy (2), ovary (1), kidney (1), muscle (1), soft tissue (1). Numbers in parentheses equal to number of patients.

Abbreviations: BMI, body mass index; ECOG, Eastern Cooperative Oncology Group.

**Table 2.** Patients' best response and grade 3–4 adverse events

| Patient | DL | No. of cycles | Study exit  | DLT        | Best response | Grade 3–4 AEs                                                              |
|---------|----|---------------|-------------|------------|---------------|----------------------------------------------------------------------------|
| 301     | 0  | 4             | AE          | No         | SD            | 2× Neutropenia, asthenia                                                   |
| 102     | 0  | 6             | End         | No         | CR            | RLC, 3× neutropenia, DVT                                                   |
| 303     | 0  | 5             | AE          | No         | —             | 2× Neutropenia, 2× thrombocytopenia                                        |
| 204     | 1  | 6             | End         | No         | SD            | Leukopenia, neutropenia, thrombocytopenia, hypertension                    |
| 305     | 1  | 3             | AE          | No         | SD            | Neutropenia, thrombocytopenia, 3× asthenia                                 |
| 106     | 1  | 1             | Death       | <b>Yes</b> | —             | Neutropenia, thrombocytopenia, hypovolemic shock                           |
| 107     | 1  | 1             | AE          | <b>Yes</b> | —             | Neutropenia, thrombocytopenia, diarrhea, mucositis                         |
| 208     | 0  | 2             | Progression | No         | PR            | UTI                                                                        |
| 209     | 0  | 6             | End         | No         | PR            |                                                                            |
| 110     | 0  | 3             | AE          | No         | SD            | Thrombocytopenia Anorexia, diarrhea, 3× asthenia                           |
| 111     | 0  | 3             | AE          | <b>Yes</b> | —             | 2× Thrombocytopenia, hyperglucemia, diarrhea, low GI hemorrhage, mucositis |
| 212     | 0  | 6             | End         | No         | SD            | Thrombocytopenia                                                           |
| 213     | 0  | 2             | AE          | No         | PR            | Neutropenia, mucositis                                                     |
| 114     | 0  | 4             | Progression | No         | SD            | Anemia, neutropenia, arthralgia                                            |
| 315     | 0  | 4             | Progression | No         | SD            |                                                                            |
| 216     | 0  | 2             | Progression | No         | PD            | Neutropenia                                                                |

Abbreviations: —, nonassessable for efficacy; ×, times; AE, adverse event; CR, complete response; DLT, dose limiting toxicity; DVT, deep venous thrombosis; GI, gastrointestinal; PD, progressive disease; PR, partial response; RLC, leukopenia count; SD, stable disease; UTI, urinary tract infection.

**Table 3.** Patients with severe adverse events

| Patient history                                                                                                        | Hospital admission 1                                                                                              | Hospital admission 2                                                                                                                                          | Hospital admission 3                                                                                                                    | Hospital admission 4                                                                                                   |
|------------------------------------------------------------------------------------------------------------------------|-------------------------------------------------------------------------------------------------------------------|---------------------------------------------------------------------------------------------------------------------------------------------------------------|-----------------------------------------------------------------------------------------------------------------------------------------|------------------------------------------------------------------------------------------------------------------------|
| Aged 75 years, male; hypertension, hyperuricemia, nephrectomy; concomitant medication: ramipril, atenolol, allopurinol | G4 thrombocytopenia (treatment discontinued)                                                                      | Hypovolemic shock due to CV cause secondary to dehydration; oliguria, hypotension without fever and unknown blood counts—death not related to study treatment |                                                                                                                                         |                                                                                                                        |
| Aged 76 years, male                                                                                                    | G3 thrombocytopenia, mucositis, and diarrhea (all related to the three drugs; treatment permanently discontinued) |                                                                                                                                                               |                                                                                                                                         |                                                                                                                        |
| Aged 67 years, male; controlled hypertension, atrial flutter, and inguinal pain                                        | Inguinal pain, respiratory infection and lower limb edema (none related to study medication)                      | G3 diarrhea and G2 mucositis, (both S and C related); G3 asthenia (related to the three drugs)                                                                | G4 thrombocytopenia, (related to the three drugs; treatment permanently discontinued); G2 nausea and diarrhea; G3 asthenia and anorexia | Deteriorated general condition; released 6 days later; hospitalized again due to disease progression, died 1 day later |

|                                                                                                        |                                                                                                                                                                   |                                           |                                                                          |
|--------------------------------------------------------------------------------------------------------|-------------------------------------------------------------------------------------------------------------------------------------------------------------------|-------------------------------------------|--------------------------------------------------------------------------|
| Aged 78 years, male                                                                                    | G2–3 mucositis (S and C related); G3 thrombocytopenia (related to the 3 drugs; C and G were reduced)                                                              | Diabetic debut (not related to treatment) | G3 diarrhea (S and C-related); abdominal pain (C-related); GI hemorrhage |
| Aged 58 years, male; withdrew from the study                                                           | Disease progression, died 12 days later                                                                                                                           |                                           |                                                                          |
| Aged 78 years, male                                                                                    | S-related hypertensive crisis (solved on the same day); G4 thrombocytopenia (related to the 3 drugs) requiring platelet transfusion                               |                                           |                                                                          |
| Aged 53 years, male                                                                                    | Non-neutropenic fever due to Enterobacter urinary infection (not related to study treatment); epileptic crisis prolonged the hospitalization; disease progression |                                           |                                                                          |
| Aged 43 years; patient on heparin treatment; intermittent hematuria, heparin treatment was interrupted | Hematuria recurred (first reported as S-related SUSAR but later considered related to heparin medication)                                                         |                                           |                                                                          |

Abbreviations: C, capecitabine; G, gemcitabine; G2, grade 2; G3, grade 3; G4, grade 4; GI, gastrointestinal; S, sunitinib; SUSAR, suspected unexpected serious adverse reaction.

**Table 4.** Drug-related adverse events

| AEs                                     | Patients, <i>n</i> (%) | No. of AEs | Grade |       |    | Drug related |    |     |    |    |
|-----------------------------------------|------------------------|------------|-------|-------|----|--------------|----|-----|----|----|
|                                         |                        |            | 1 + 2 | 3 + 4 | Uk | S            | SC | C/G | Tt | Uk |
| Complementary tests                     |                        | 3          |       |       |    |              |    |     |    |    |
| Increased $\gamma$ -glutamyltransferase | 1 (6.3)                | 1          | 1     |       |    |              |    |     |    | 1  |
| Decreased hemoglobin                    | 1 (6.3)                | 1          | 1     |       |    |              |    |     |    | 1  |
| Decreased leukocyte count               | 1 (6.3)                | 1          |       | 1     |    |              |    |     |    | 1  |
| Infections and infestations             |                        | 1          |       |       |    |              |    |     |    |    |
| Nasopharyngitis                         | 1 (12.5)               | 1          | 1     |       |    |              |    |     |    | 1  |
| Surgical and medical procedures         |                        | 1          |       |       |    |              |    |     |    |    |
| Nasal blockage                          | 1 (6.3)                | 1          | 1     |       |    |              |    |     |    | 1  |
| Skin and subcutaneous tissue disorders  |                        | 13         |       |       |    |              |    |     |    |    |
| Alopecia                                | 1 (6.3)                | 1          | 1     |       |    | 1            |    |     |    |    |
| Rush                                    | 2 (12.5)               | 2          | 2     |       |    |              | 1  |     |    | 1  |



|                                                      |           |    |    |    |   |    |   |    |     |
|------------------------------------------------------|-----------|----|----|----|---|----|---|----|-----|
| Pruritus                                             | 1 (6.3)   | 1  | 1  |    |   |    |   | 1  |     |
| Palmar-plantar erythrodyesthesia syndrome            | 3 (18.8)  | 4  | 4  |    |   | 1  | 2 | 1  |     |
| Skin disorders                                       | 1 (6.3)   | 1  | 1  |    |   | 1  |   |    |     |
| Pigmentation disorders                               | 1 (6.3)   | 1  | 1  |    |   | 1  |   |    |     |
| Blood and lymphatic system disorders                 |           | 59 |    |    |   |    |   |    |     |
| Anemia                                               | 2 (12.5)  | 2  | 1  | 1  |   |    |   |    | 2   |
| Leukopenia                                           | 5 (31.3)  | 6  | 5  | 1  |   |    |   | 4  | 2   |
| Neutropenia                                          | 12 (75)   | 25 | 11 | 14 |   | 1  |   | 15 | 8 1 |
| Thrombocytopenia                                     | 9 (56.3)  | 26 | 16 | 10 |   | 8  | 2 | 7  | 9   |
| Metabolism and nutrition disorders                   |           | 11 |    |    |   |    |   |    |     |
| Anorexia                                             | 6 (37.5)  | 11 | 10 | 1  |   |    |   |    | 9 2 |
| Nervous system disorders                             |           | 3  |    |    |   |    |   |    |     |
| Dysesthesia                                          | 2 (12.5)  | 2  | 2  |    |   |    |   |    | 2   |
| Somnolence                                           | 1 (6.3)   | 1  | 1  |    |   |    |   |    | 1   |
| Endocrine disorders                                  |           | 2  |    |    |   |    |   |    |     |
| Hypothyroidism                                       | 2 (12.5)  | 2  | 1  |    | 1 | 2  |   |    |     |
| Gastrointestinal disorders                           |           | 65 |    |    |   |    |   |    |     |
| Dry mouth                                            | 4 (25)    | 5  | 5  |    |   |    |   |    | 5   |
| Diarrhea                                             | 11 (68.8) | 21 | 18 | 3  |   | 7  | 1 | 9  | 4   |
| Dysgeusia                                            | 4 (25)    | 5  | 5  |    |   | 1  |   | 1  | 3   |
| Heartburn/dyspepsia                                  | 3 (18.8)  | 4  | 4  |    |   |    |   | 3  | 1   |
| Abdominal pain                                       | 1 (6.3)   | 1  | 1  |    |   |    | 1 |    |     |
| Dental pain                                          | 1 (6.3)   | 1  | 1  |    |   |    |   |    | 1   |
| Pain in the upper abdomen                            | 2 (12.5)  | 4  | 4  |    |   |    |   | 1  | 3   |
| Constipation                                         | 1 (6.3)   | 1  | 1  |    |   |    |   |    | 1   |
| Flatulence                                           | 1 (6.3)   | 1  | 1  |    |   |    |   |    | 1   |
| Gingivitis                                           | 2 (12.5)  | 2  | 2  |    |   |    |   | 1  | 1   |
| Glositis                                             | 1 (6.3)   | 1  | 1  |    |   |    |   | 1  |     |
| Low GI tract hemorrhage                              | 1 (6.3)   | 1  |    | 1  |   |    |   | 1  |     |
| Dental pain                                          | 1 (6.3)   | 1  | 1  |    |   |    |   | 1  |     |
| Nausea                                               | 9 (56.3)  | 14 | 14 |    |   | 1  |   | 6  | 7   |
| Vomiting                                             | 3 (18.8)  | 3  | 2  |    | 1 |    |   | 1  | 2   |
| General disorders and administration site conditions |           | 76 |    |    |   |    |   |    |     |
| Asthenia                                             | 13 (81.3) | 46 | 38 | 8  |   | 11 |   | 6  | 29  |
| Peripheral edema                                     | 2 (12.5)  | 2  | 2  |    |   | 2  |   |    |     |
| Mucositis                                            | 11 (68.8) | 23 | 19 | 3  | 1 |    | 2 | 9  | 12  |
| Pirexia                                              | 3 (18.8)  | 4  | 4  |    |   |    |   | 2  | 2   |
| Dry mucus                                            | 1 (6.3)   | 1  | 1  |    |   |    |   |    | 1   |
| Musculoskeletal and soft tissue disorders            |           | 1  |    |    |   |    |   |    |     |
| Joint pain                                           | 1 (6.3)   | 1  | 1  |    |   |    |   |    | 1   |
| Eye disorders                                        |           | 3  |    |    |   |    |   |    |     |
| Conjunctivitis                                       | 1 (6.3)   | 1  | 1  |    |   | 1  |   |    |     |
| Increased tear production                            | 1 (6.3)   | 1  | 1  |    |   |    |   | 1  |     |
| Dry eye                                              | 1 (6.3)   | 1  | 1  |    |   | 1  |   |    |     |

|                                                  |          |            |            |           |          |           |          |           |            |          |
|--------------------------------------------------|----------|------------|------------|-----------|----------|-----------|----------|-----------|------------|----------|
| Psychiatric disorders                            |          | 1          |            |           |          |           |          |           |            |          |
| Insomnia                                         | 1 (6.3)  | 1          | 1          |           |          |           |          |           |            | 1        |
| Renal and urinary disorders                      |          | 1          |            |           |          |           |          |           |            |          |
| Dysuria                                          | 1 (6.3)  | 1          | 1          |           |          | 1         |          |           |            |          |
| Respiratory, thoracic, and mediastinal disorders |          | 9          |            |           |          |           |          |           |            |          |
| Dysphonia                                        | 1 (6.3)  | 2          | 2          |           |          |           |          |           |            | 2        |
| Epistaxis                                        | 4 (25)   | 5          | 5          |           |          |           |          | 2         |            | 3        |
| Hiccups                                          | 1 (6.3)  | 1          | 1          |           |          |           |          |           |            | 1        |
| Nasal ulcer                                      | 1 (6.3)  | 1          | 1          |           |          |           |          |           |            | 1        |
| Vascular disorders                               |          | 6          |            |           |          |           |          |           |            |          |
| Hypertension                                     | 5 (31.3) | 6          | 5          | 1         |          | 6         |          |           |            |          |
| <b>Total events</b>                              |          | <b>252</b> | <b>205</b> | <b>44</b> | <b>3</b> | <b>46</b> | <b>9</b> | <b>73</b> | <b>121</b> | <b>3</b> |

Abbreviations: AEs, adverse events; G/C, gemcitabine and/or capecitabine; GI, gastrointestinal; S, sunitinib; SC, sunitinib and capecitabine; Tt, three-drug combination treatment; Uk, unknown.

[Click here](#) to access other published clinical trials.

---
